# Supplementary material
Source: PubMed Central journal article supplement (PMC2634898)
Supplement: 0811411106_0811411106SI.pdf [file 0811411106_0811411106SI.pdf]

# Supporting Information

Goldstein *et al.* 10.1073/pnas.0811411106

## SI Text

**Antibodies Used for Immunofluorescent and Histological Analysis.** Primary antibodies used were: CD49f (555734; BD Biosciences), Cytokeratin 5 (PRB-160P; Covance), Cytokeratin 8 (MMS-184I; Covance), p63 (sc-8431; Santa Cruz Biotechnologies), AR (sc-7305; Santa Cruz Biotechnologies), Trop2 (mouse: BAF1122; human: BAF650; R&D Systems), and Synaptophysin (MAB5258; Chemicon). Secondary antibodies used were: Alexa 594 or Alexa 488 anti-mouse (Invitrogen), Alexa 594 or Alexa 488 anti-rabbit (Invitrogen), and Alexa 594 or Alexa 488 conjugated to Streptavidin (Invitrogen).

**Antibodies Used for FACS Analysis and Sorting.** Primary antibodies used were: CD49f-PE (555736; BD Biosciences), CD49f-Alexa647 (313610; Biolegend), Sca-1 PE-Cy7 (122514; Biolegend), CD31-FITC (11-0311; eBioscience), CD45-FITC (11-0451; eBioscience), Ter119-FITC (11-5921; eBioscience), and Trop2-biotin (mouse: BAF1122; human: BAF650; R&D Systems). Secondary antibodies used were: Streptavidin-APC (554067; BD Biosciences) and Streptavidin-APC-Cy7 (405208; Biolegend).

**Intact murine prostate**

**Castrated murine prostate**

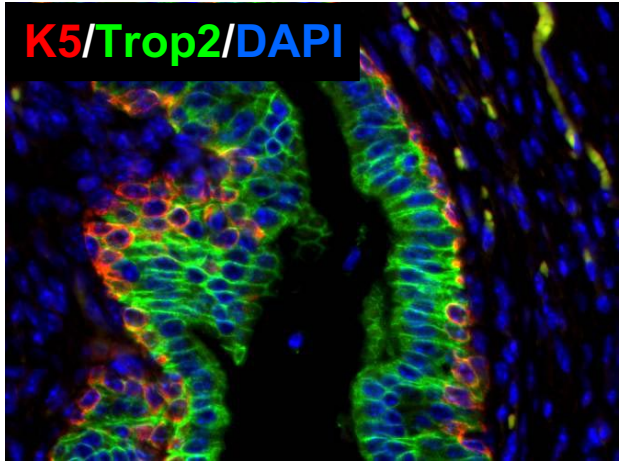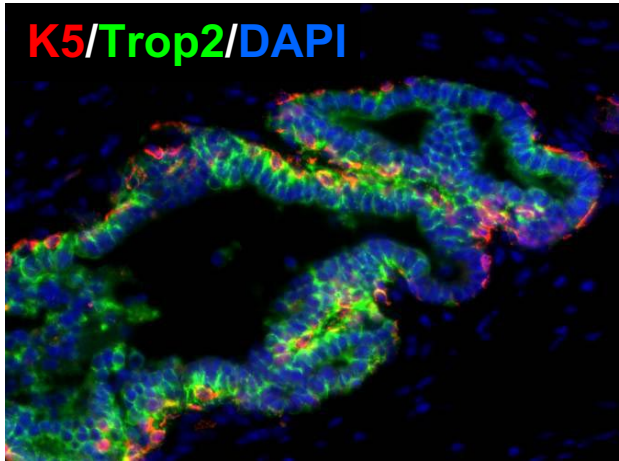

Proximal

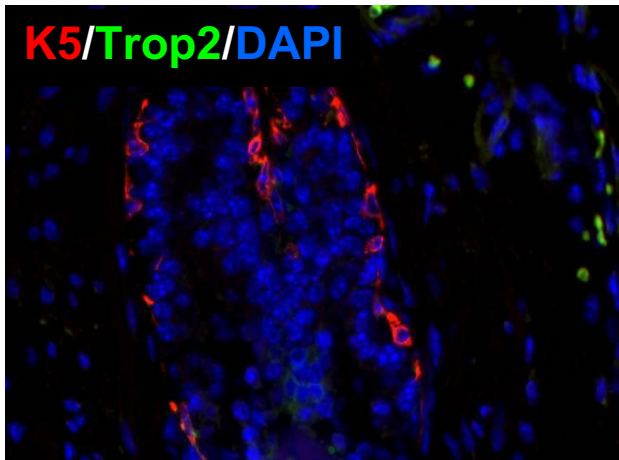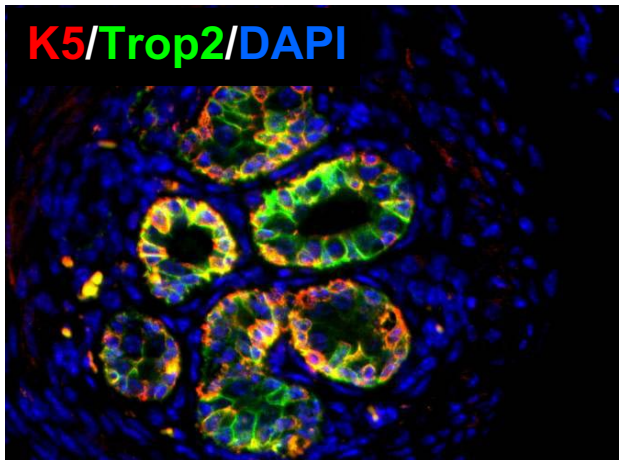

Distal

**Fig. S1.** An expansion of Trop2<sup>hi</sup> basal cells in the murine prostate after castration. Paraffin-embedded tissue sections of castrated and intact murine prostates were stained for antibodies against Trop2 and cytokeratin 5. Sections were counterstained with DAPI nuclear stain. (Original magnification: 400×.)

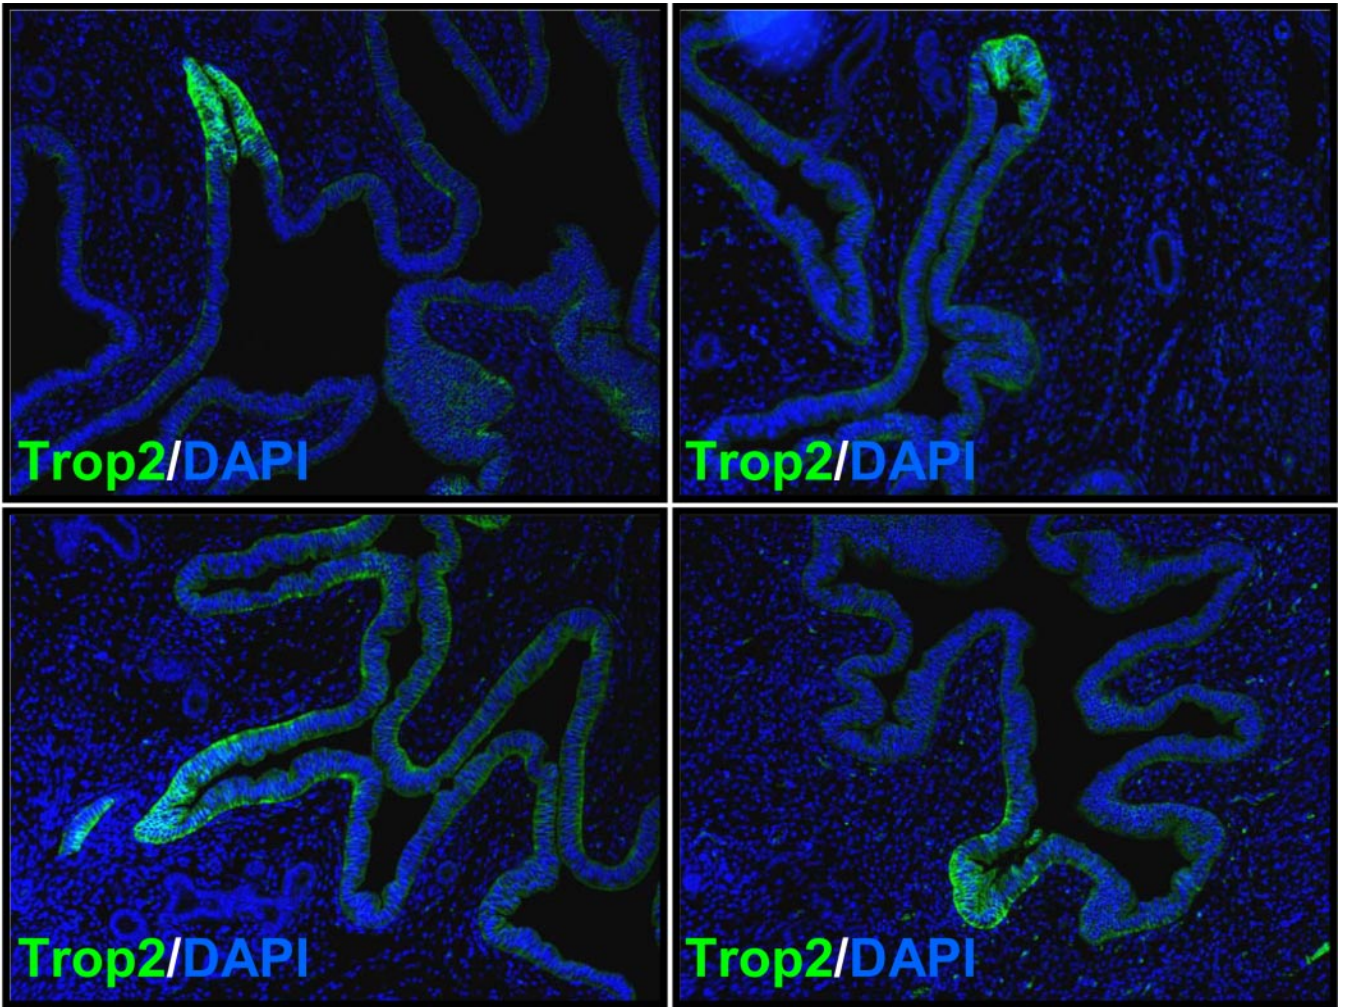

**Fig. S2.** Trop2 expression in murine endometrial glands. Frozen sections of adult murine endometrial glands were stained for Trop2 and counterstained with DAPI nuclear stain. (Original magnification: 100 $\times$ .)

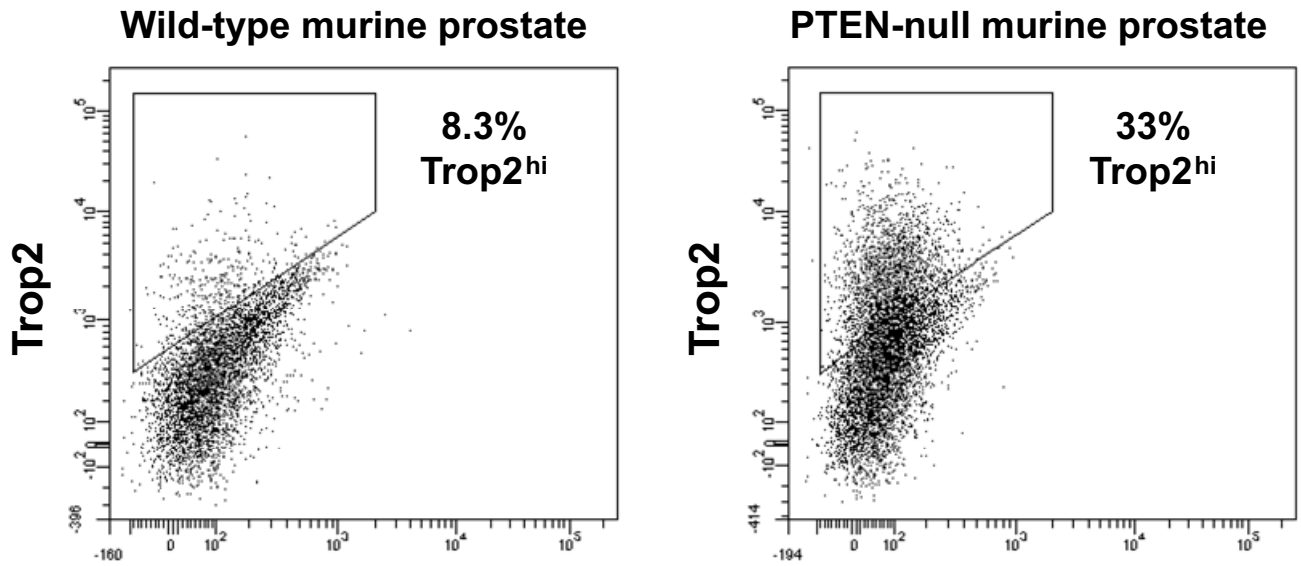

**Fig. S3.** An expansion of Trop2<sup>hi</sup> cells in PTEN-null murine prostate cancer. Prostates from 15-week-old Pten-null and wild-type (C57BL/6) mice were dissociated into single cells and stained for Trop2. FACS plots show an increase in Trop2<sup>hi</sup> cells from Pten-null prostate tissue.

**Table S1. Primer sequences for qRT-PCR**

| Gene          | 5' (listed from 5' to 3') | 3' (listed from 5' to 3') |
|---------------|---------------------------|---------------------------|
| <i>Trop2</i>  | AGACCAAAGCCTGCGCTGCG      | AGCTGGGGTGCAGCTTGTAG      |
| <i>p63</i>    | TTATGAGCCACCACAGGTT       | ACGCAGCTGCTGTTACACAT      |
| <i>Sca-1</i>  | CCATCAATTACCTGCCCTA       | GGCAGATGGGTAAGCAAGA       |
| <i>CD49f</i>  | AGAGACATGAAGTCCGCGCA      | ACCTTCCCAGATCATCATAG      |
| <i>K14</i>    | CCTCTGGCTCTCAGTCATCC      | TGAGCAGCATGTAGCAGCTT      |
| <i>K5</i>     | GAGATCGCCACCTACAGGAA      | TCCTCCGTAGCCAGAAGAGA      |
| <i>Nkx3.1</i> | CTCCAGAGCCCGACAAAG        | CACTTGCTAAGTCCCCTGGA      |
| <i>GAPDH</i>  | TGTTCTACCCCAATGTGT        | GGTCCTCAGTGTAGCCCAAG      |
